# Supplementary figures and images for: Structure of the Vesicular Stomatitis Virus L Protein in Complex with Its Phosphoprotein Cofactor
Source: PubMed Central journal article supplement — Cell Rep. Author manuscript; Available in PMC 2020 Feb 29. (PMC7049099; doi:10.1016/j.celrep.2019.12.024), 2020-01-07

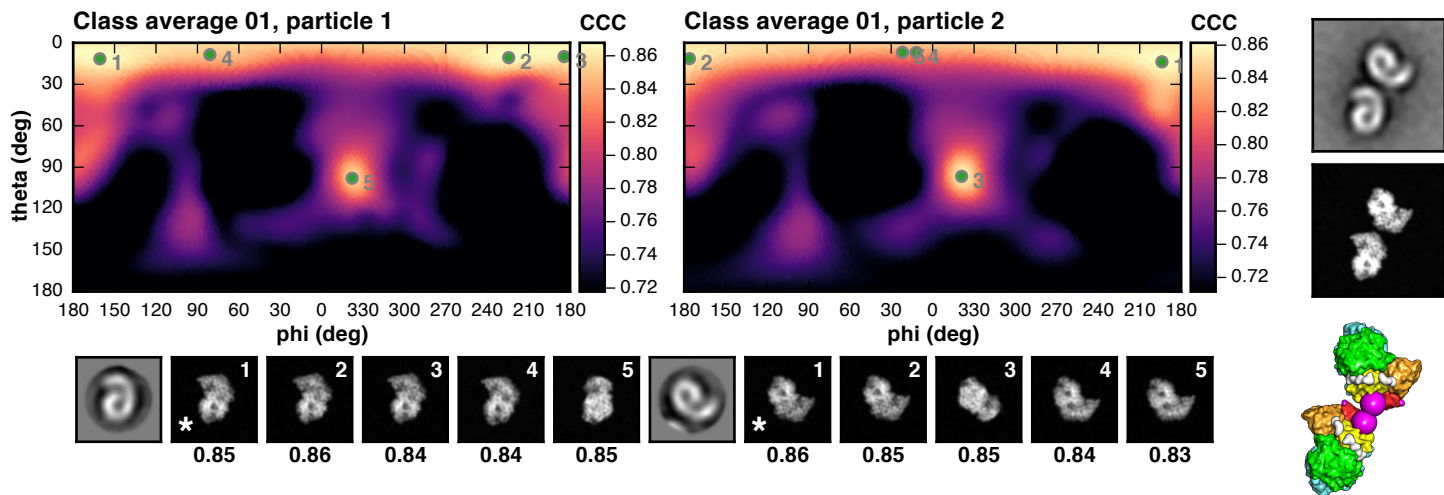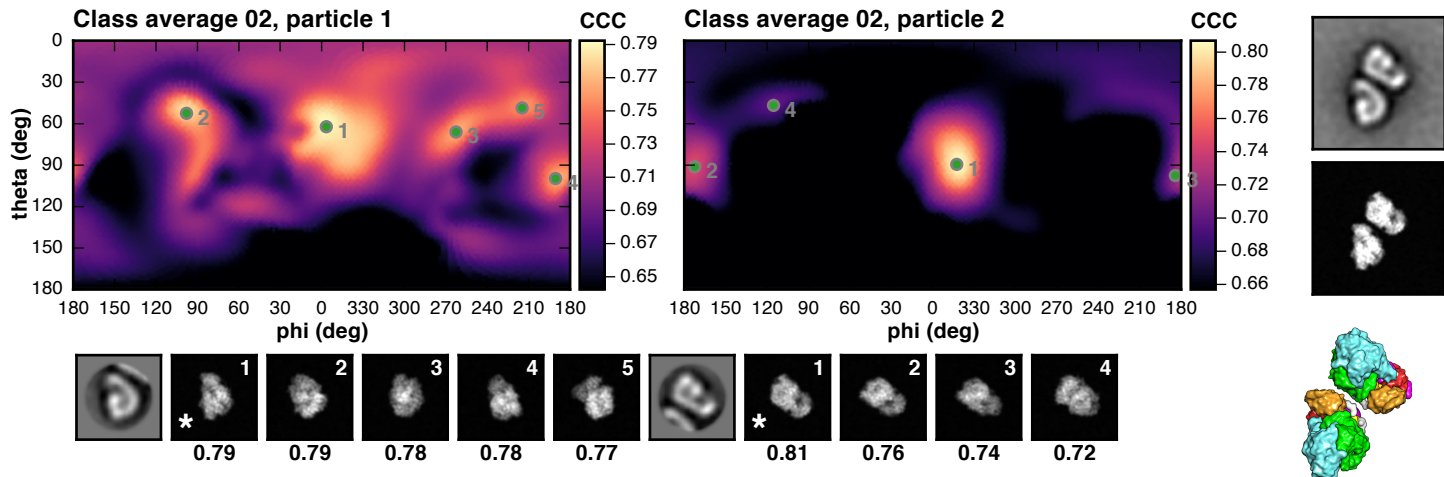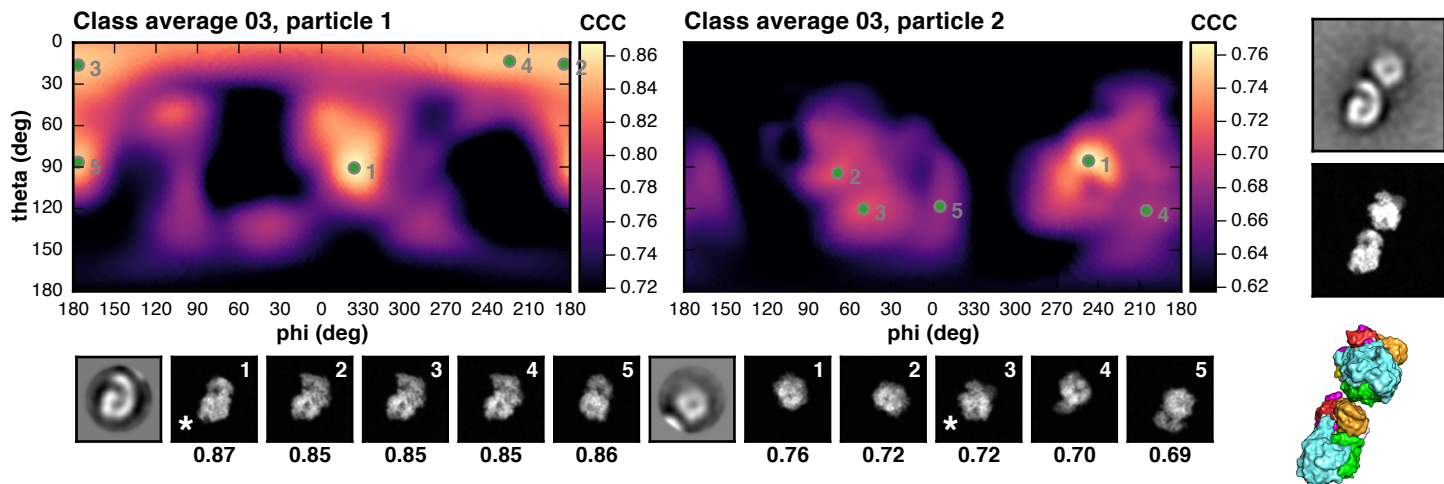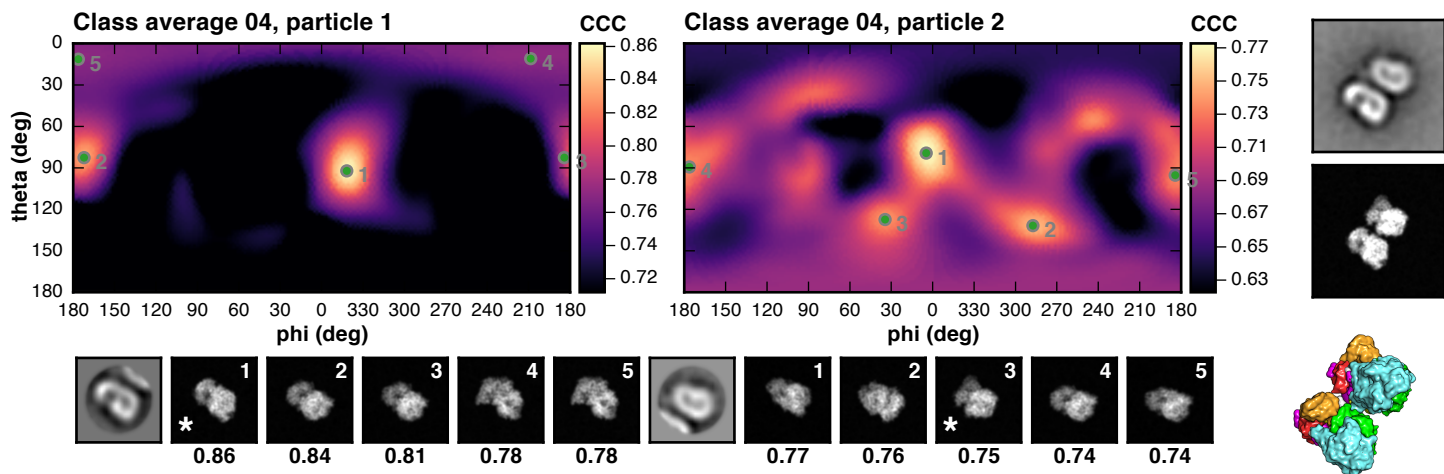

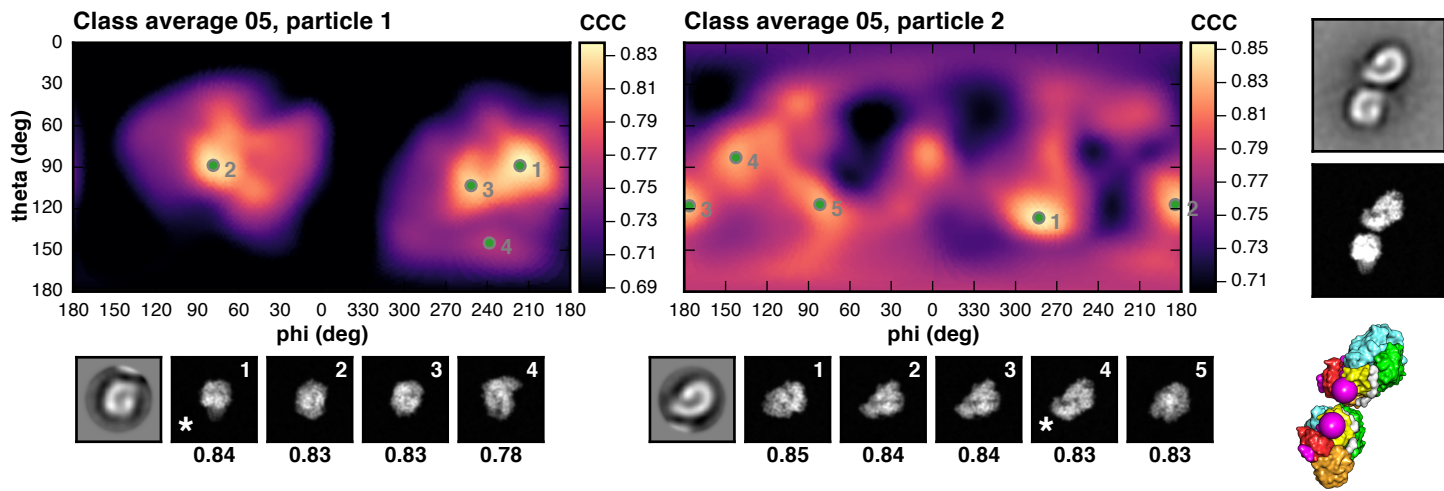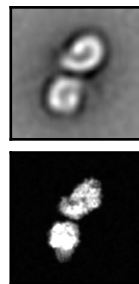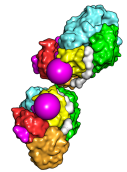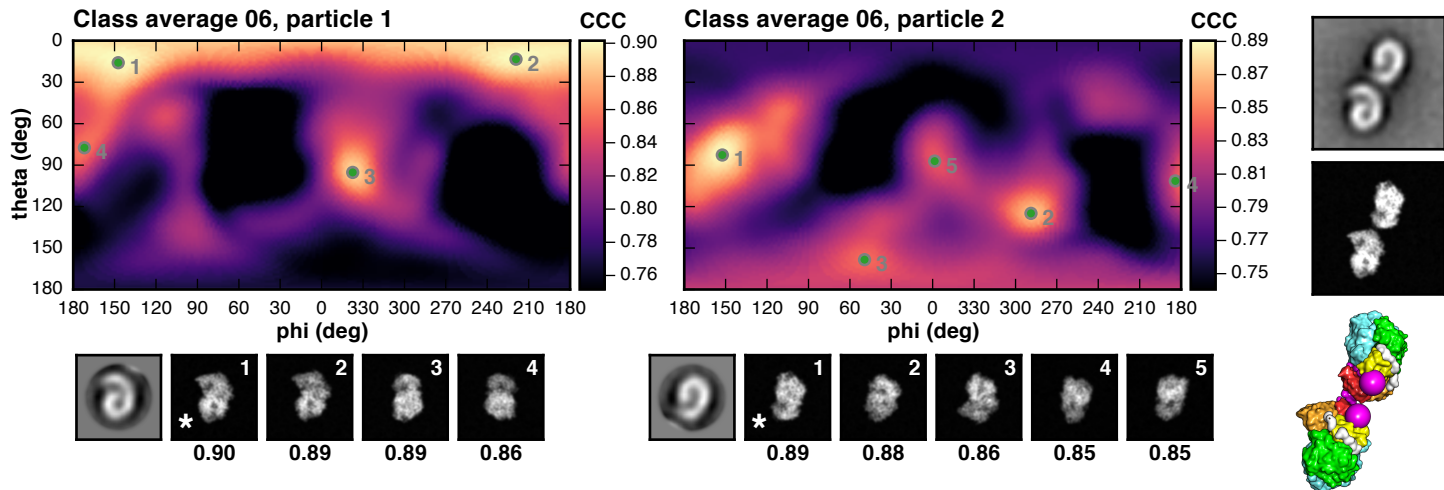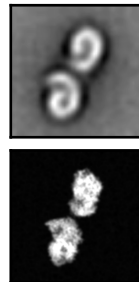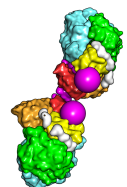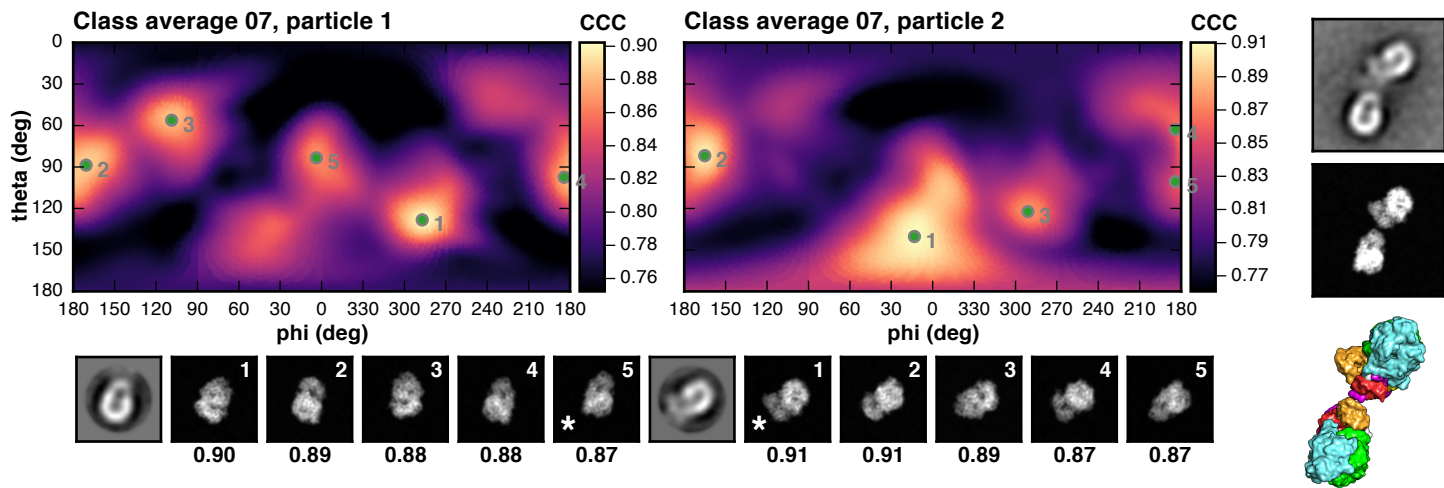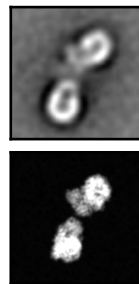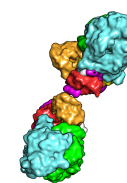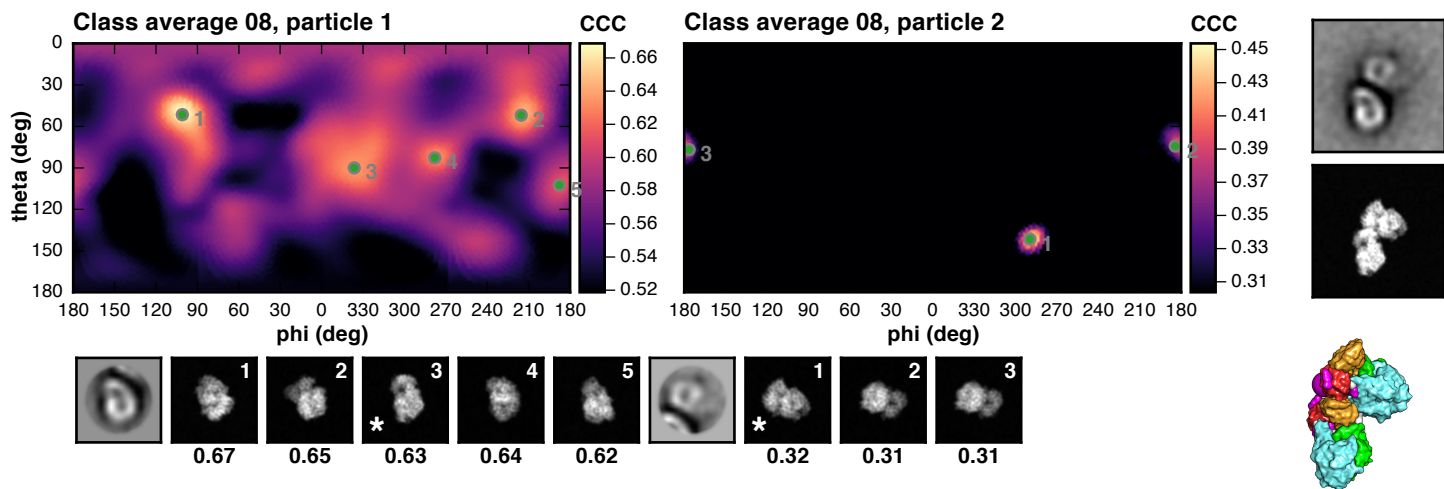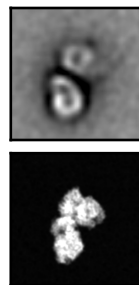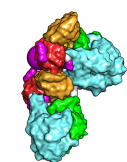

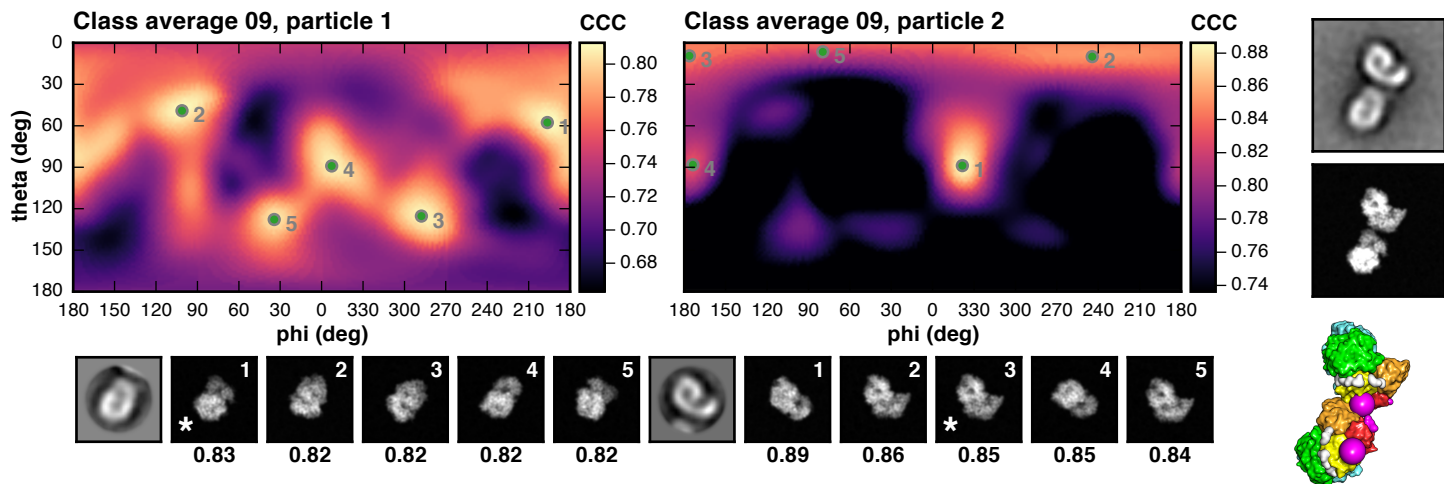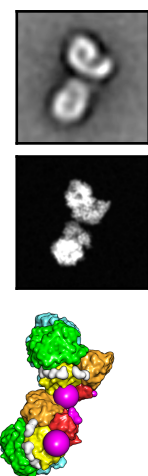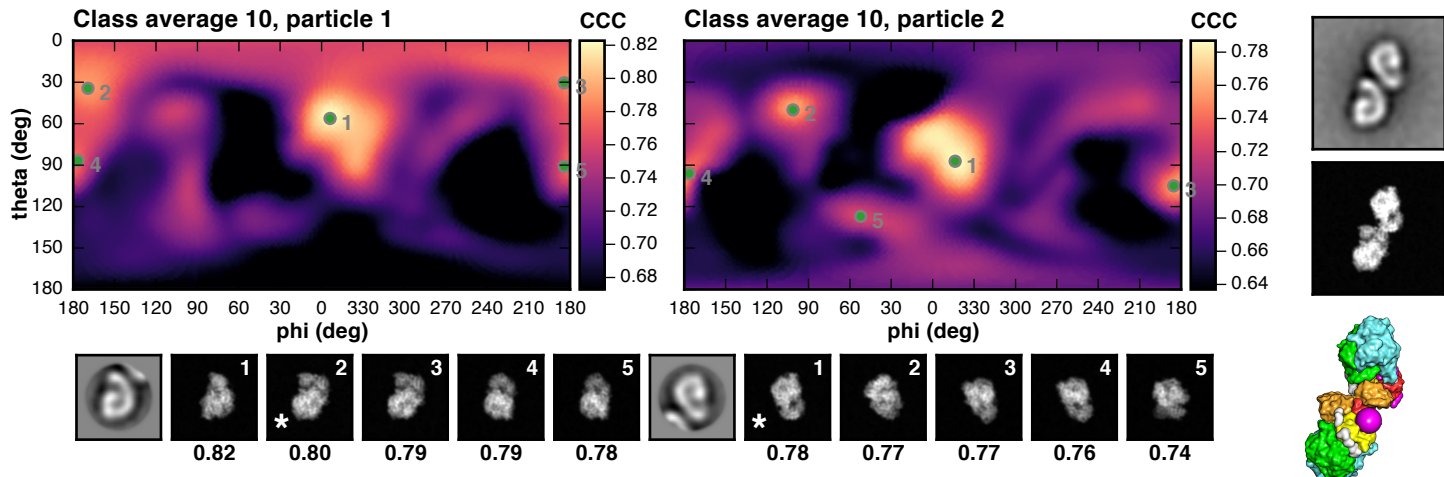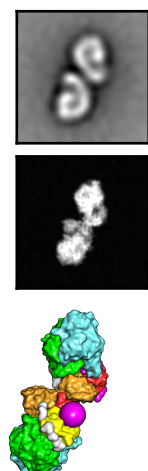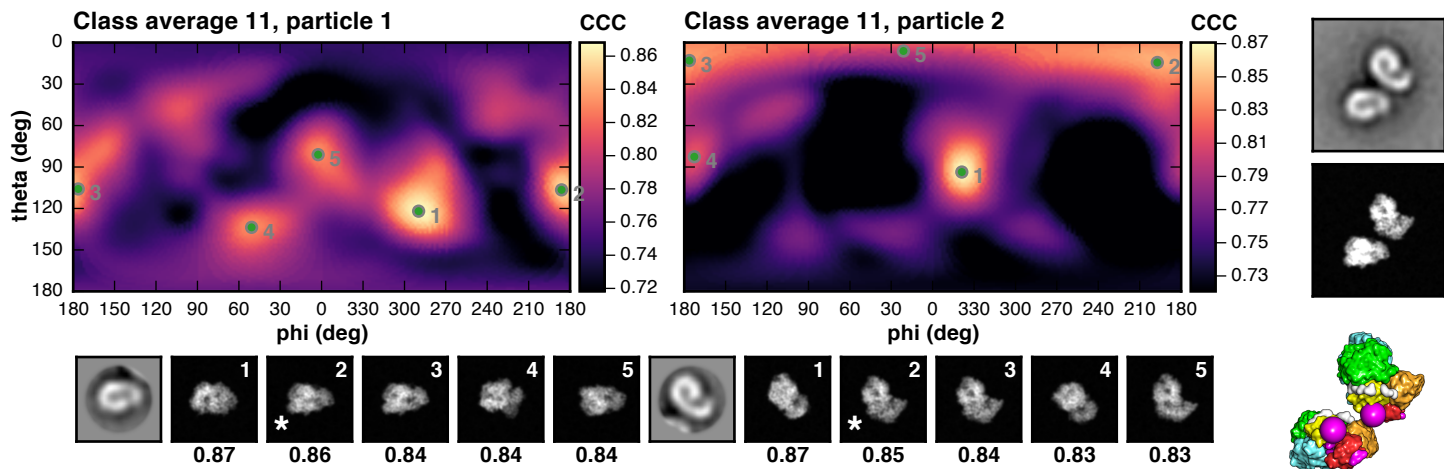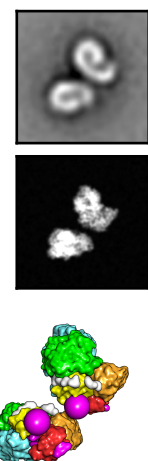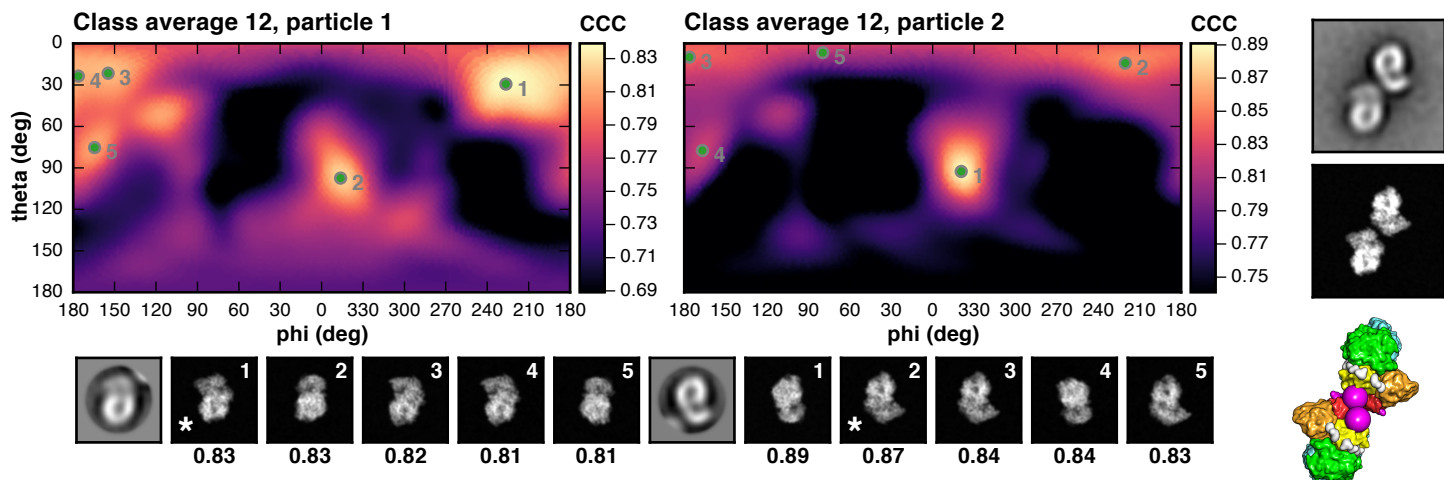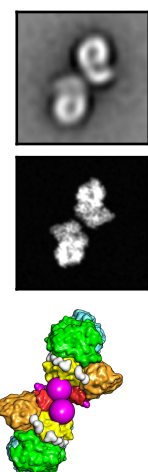

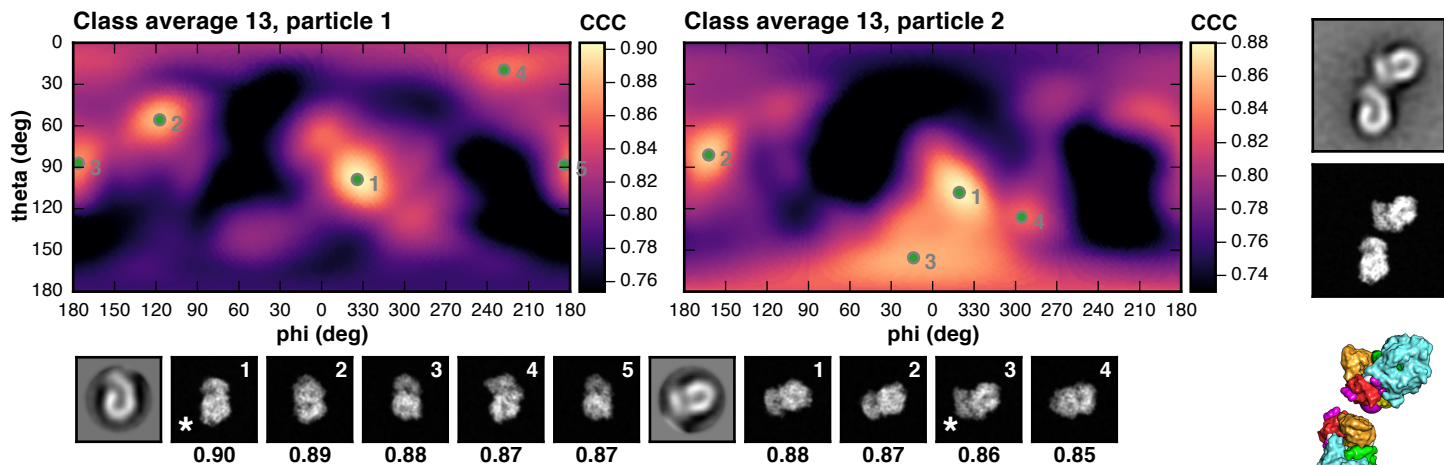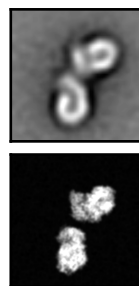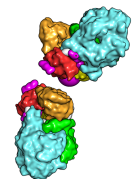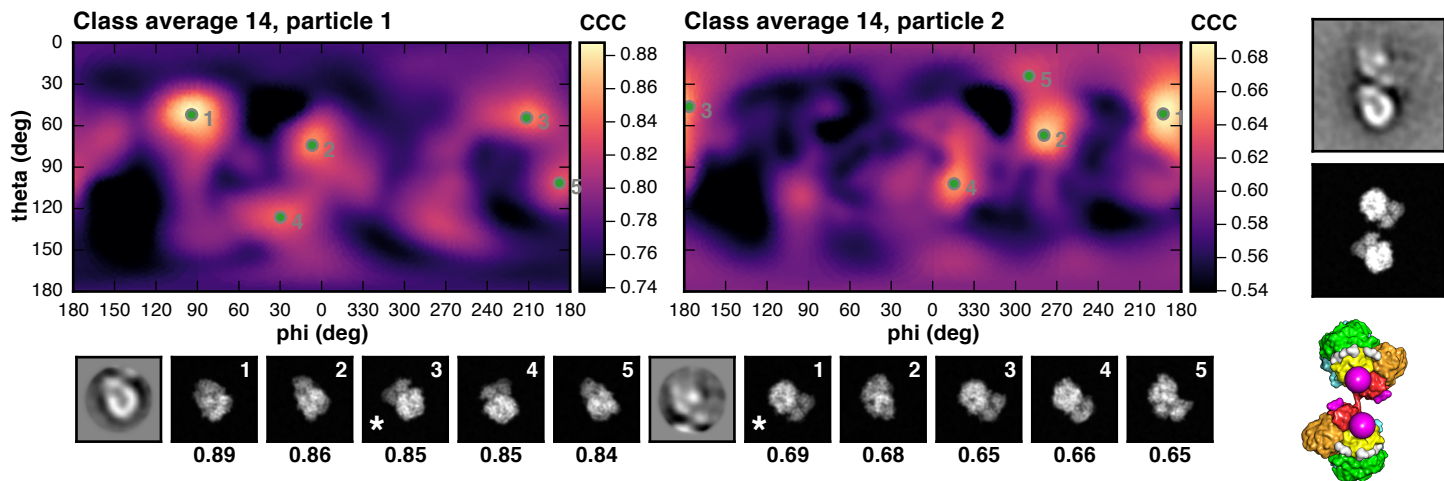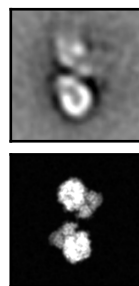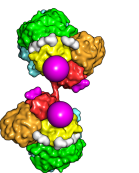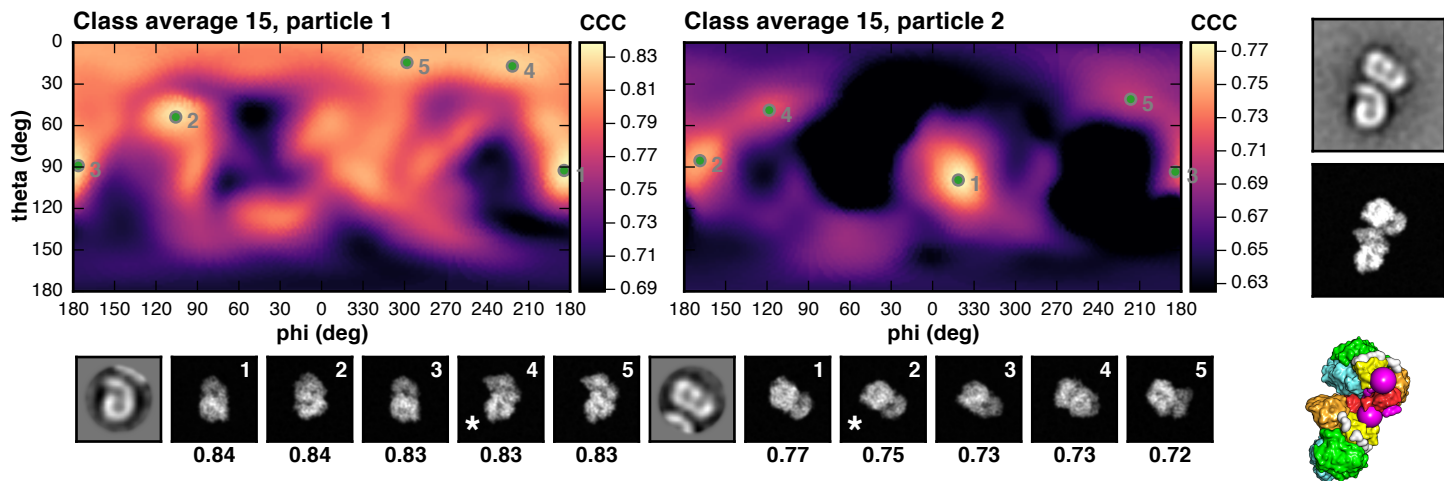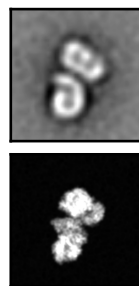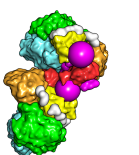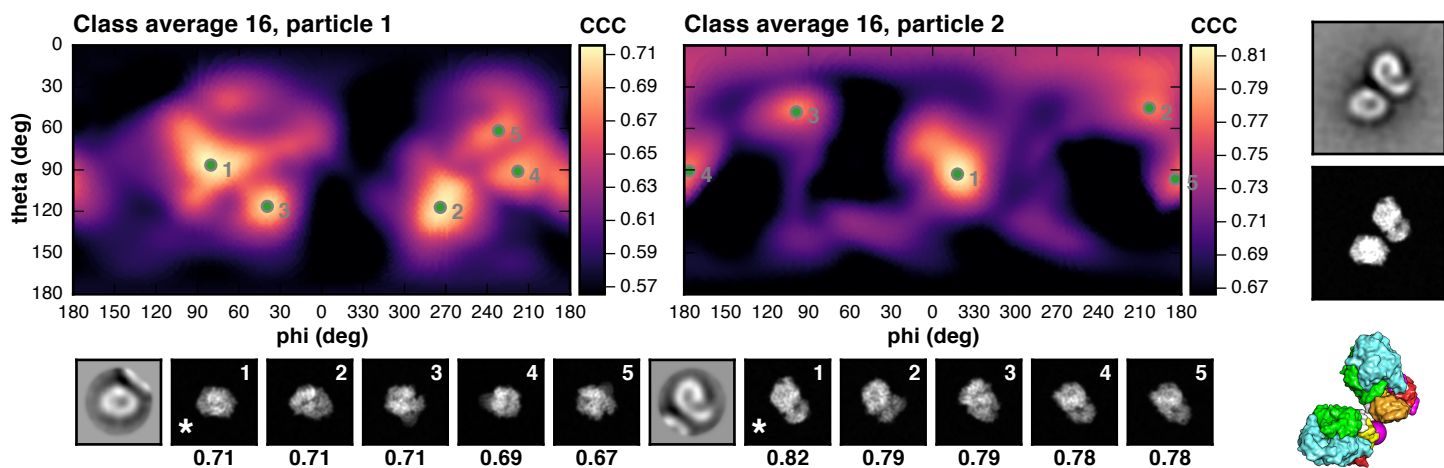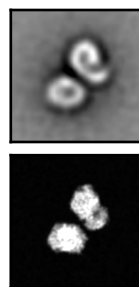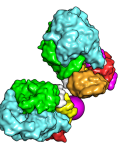

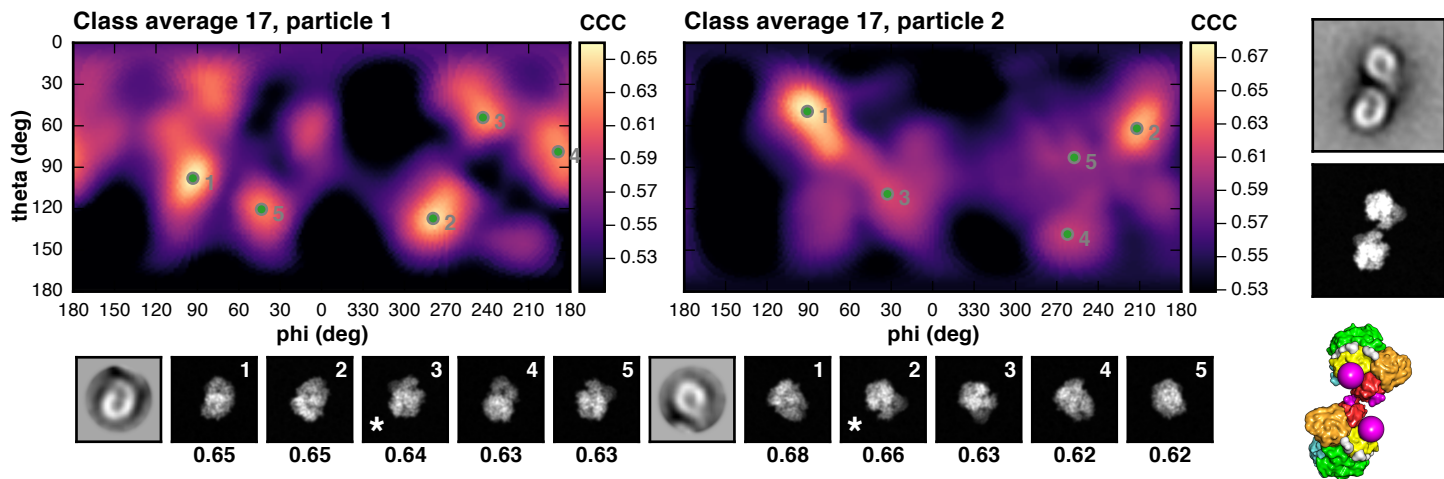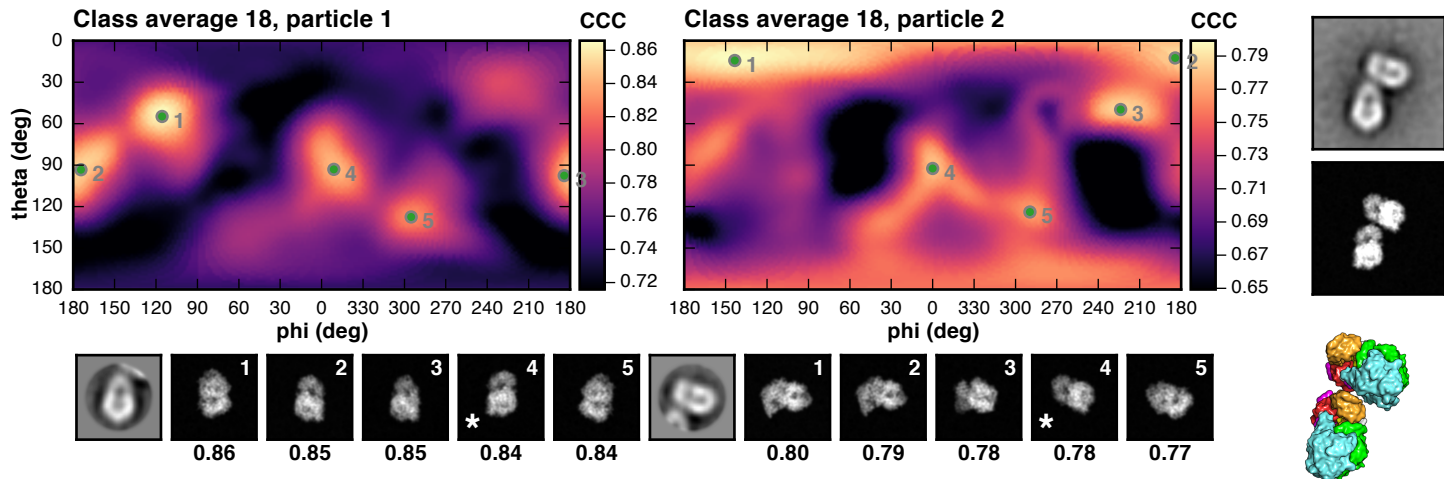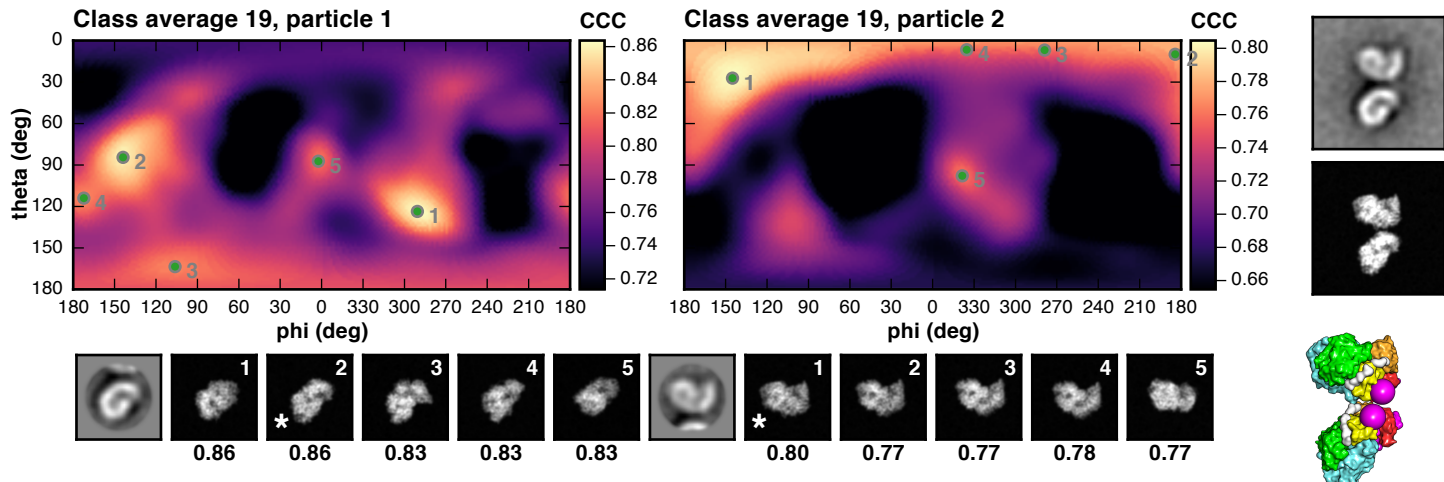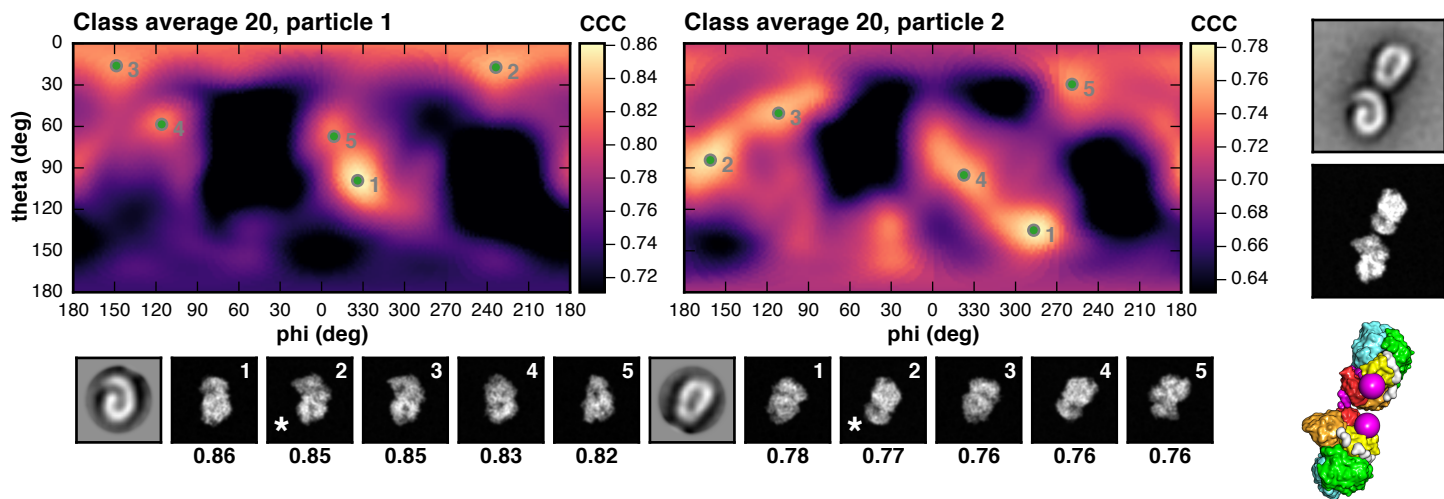

Supplement: NIHMS1548558-supplement-3.pdf [file NIHMS1548558-supplement-3.pdf]
